# Supplementary material for: BRG1 Activates PR65A Transcription to Regulate NO Bioavailability in Vascular Endothelial Cells
Source: PubMed Central journal article supplement (PMC7443572; doi:10.3389/fcell.2020.00774), 2020-08-12
Supplement: Image_1.pdf [file Image_1.pdf]

Chen BY et al: BRG1 activates PR65A transcription to regulate NO bioavailability in vascular endothelial cells

Online supplementary material

A

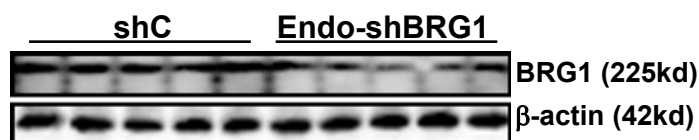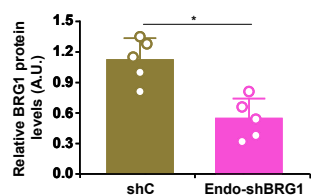

B

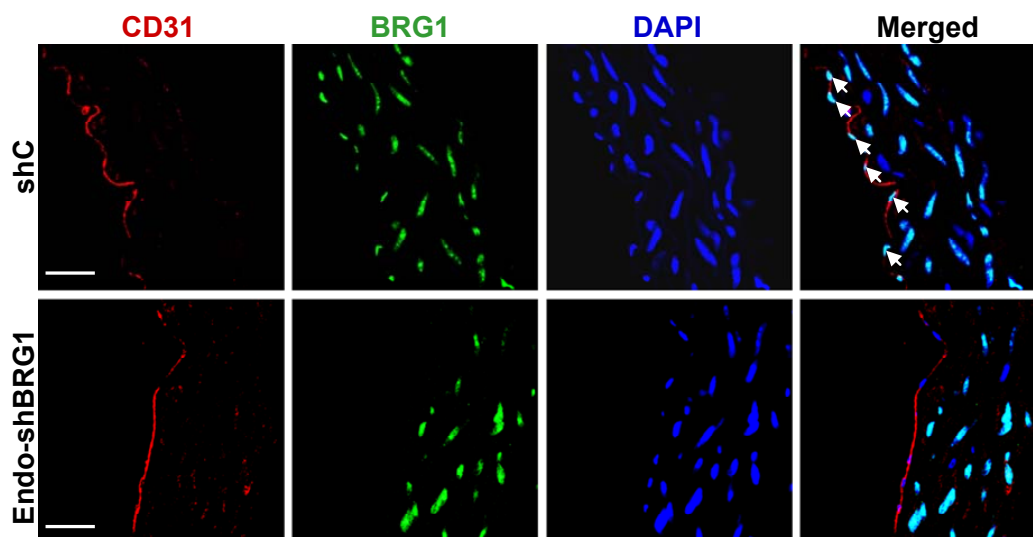

**Fig.S1:** 8-week male *Apoe*<sup>-/-</sup> mice were injected with lentivirus carrying endothelial-specific BRG1 shRNA (Endo-shBRG1) or the control virus (shC). (A) Whole tissue lysates were extracted from aortic arteries and BRG1 expression was examined by Western blotting. (B) Immunofluorescence staining was performed in paraffin sections of aortic arteries with indicated antibodies.

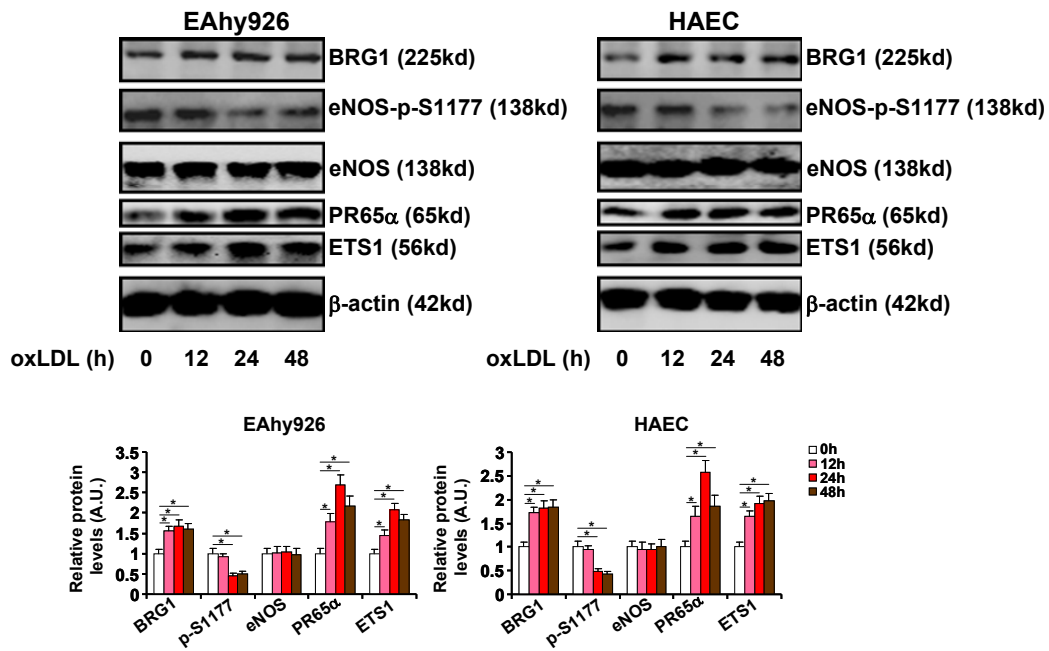

**Fig.S2:** EAhy296 cells and HAECs were treated with oxLDL (10μg/ml) and harvested at indicated time points. Expression levels were examined by Western blotting.

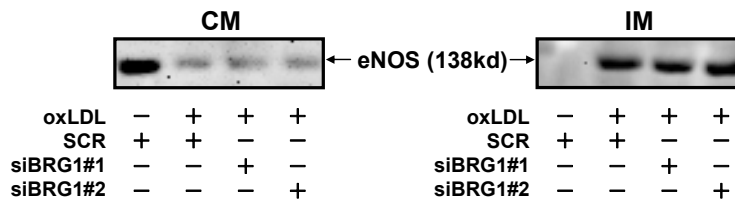

**Fig.S3:** EAhy926 cells were transfected with siRNA targeting BRG1 or scrambled siRNA (SCR) followed by treatment with oxLDL (10μg/ml) for 24h. Caveolae membrane (CM) and total intracellular membrane (IM) were isolated and eNOS expression was detected by Western blotting.

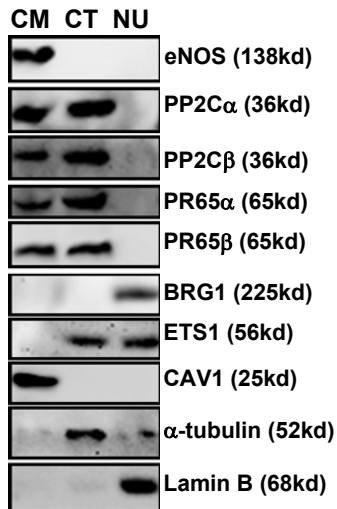

**Fig.S4:** EAhy926 cells were fractionated into three parts, the caveolae membrane (CM), the cytoplasm (CT), and the nucleus (NT), by standard procedure. Protein expression was detected by Western blotting.

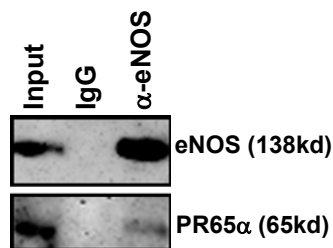

**Fig.S5:** Immunoprecipitation was performed with an anti-eNOS antibody using whole cell lysates extracted from EAhy926 cells.

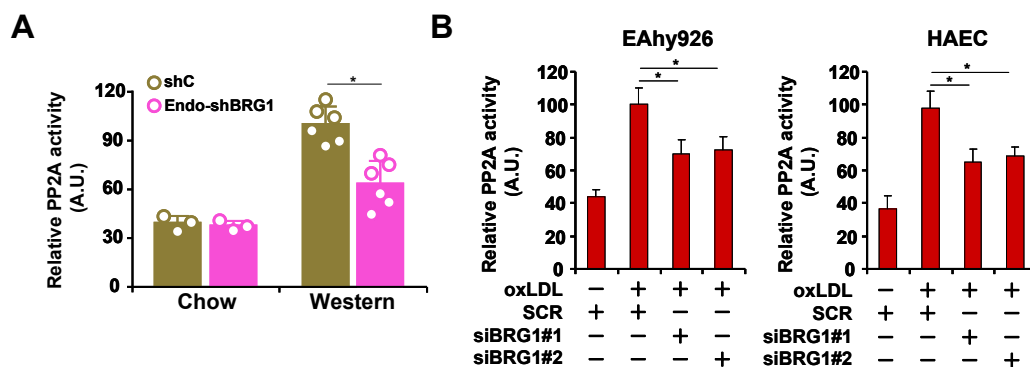

**Fig.S6:** (A) 8-week male *Apoe*<sup>-/-</sup> mice were injected with lentivirus carrying endothelial-specific BRG1 shRNA (Endo-shBRG1) or the control virus (shC) and fed a Western diet or a control diet for 8 weeks as described in Methods. (B) EAhy926 cells and HAECs were transfected with siRNA targeting BRG1 or scrambled siRNA (SCR) followed by treatment with oxLDL (10 $\mu$ g/ml) for 24h. PP2A activity was examined in the arteries or in endothelial cells by a commercially available kit as described in the Methods.
